# Supplementary material for: Geometry and Microstructure Control of Remanufactured Metallic Parts by Cold Spray Additive Manufacturing
Source: MDPI journal article supplement (doi:10.3390/ma16134735), 2023-06-30
Supplement: s1 [file s1]

# Geometry and Microstructure Control of Remanufactured Metallic Parts by Cold Spray Additive Manufacturing

Andrea Garfias, Rodolpho Vaz, Vicente Albaladejo-Fuentes \*, Javier Sánchez and Irene Garcia Cano

Centre de Projectió Tèrmica, Departament de Ciència del Materials i Química Física, Universitat de Barcelona, Martí i Franquès, 1, 08028 Barcelona, Spain; agarfias@cptub.eu (A.G.); rvaz@cptub.eu (R.V.); jsanchez@cptub.eu (J.S.); igcano@cptub.eu (I.G.C.)

\* Correspondence: valbaladejo@cptub.eu

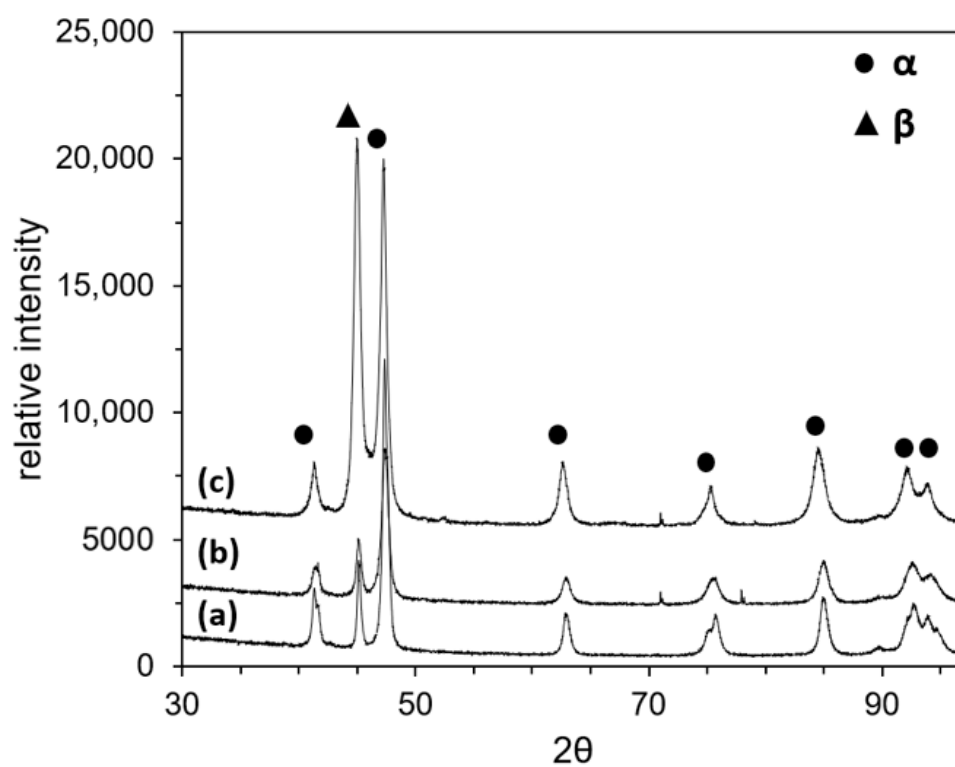

**Figure S1.** XRD results of (a) Ti6Al4V powder, (b) MK-Ti6Al4V, and (c) MK-Ti6Al4V HT
